# Supplementary material for: A comparative study on the antioxidant activity of methanolic extracts from different parts of Morus alba L. (Moraceae)
Source: PubMed Central journal article supplement (PMC3559264; doi:10.1186/1756-0500-6-24), 2013-01-19
Supplement: 1756-0500-6-24-S1.pdf [file 1756-0500-6-24-S1.pdf]

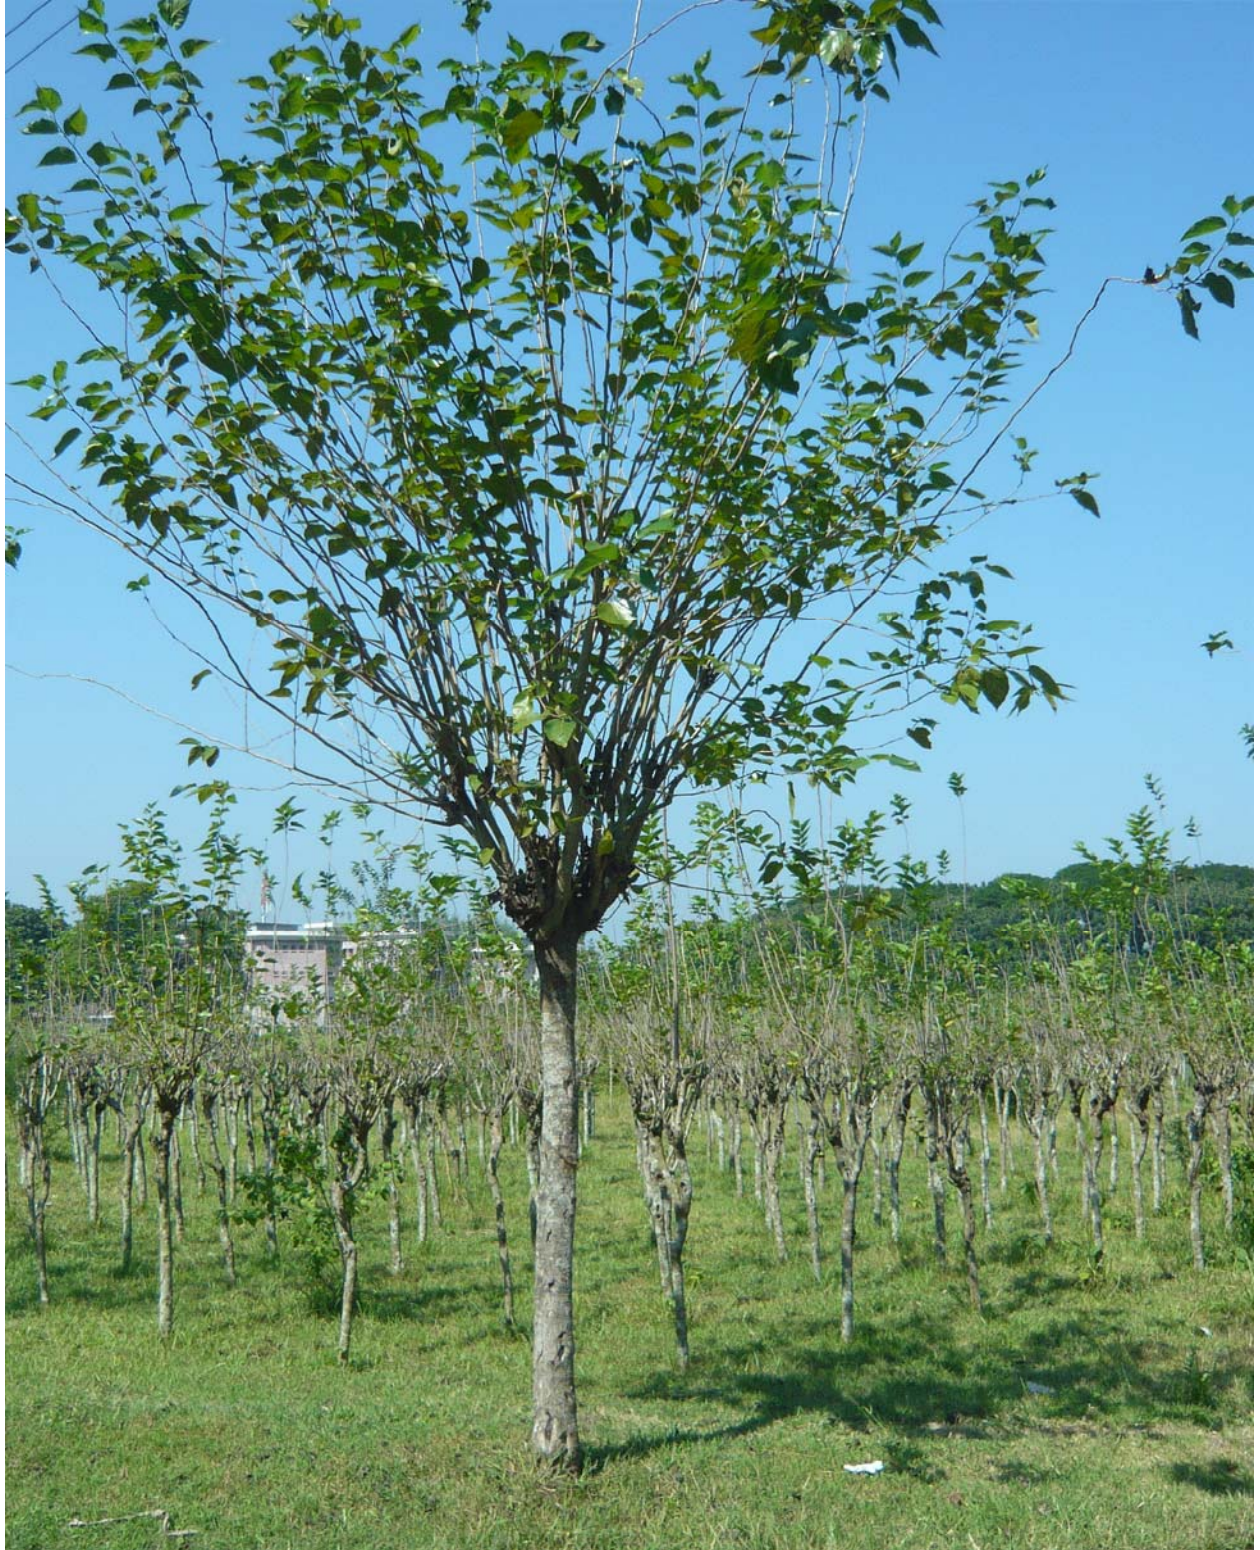

**Supplementary Fig 1:** Matured *Morus alba* L. (Moraceae) plant (locally known as Tut). Picture was taken on October, 2010 from botanical garden, Rajshahi University, Bangladesh.
